# Supplementary material for: Sugar-Free Milk Chocolate as a Carrier of Omega-3 Polyunsaturated Fatty Acids and Probiotics: A Potential Functional Food for the Diabetic Population
Source: MDPI journal article supplement (doi:10.3390/foods10081866), 2021-08-12
Supplement: s1 [file s1]

Supplementary Materials

# Sugar-Free Milk Chocolate as a Carrier of Omega-3 Polyunsaturated Fatty Acids and Probiotics: A Potential Functional Food for the Diabetic Population

Andrea R. Gómez-Fernández <sup>1</sup>, Paulinna Faccinnetto-Beltrán <sup>1</sup>, Norma E. Orozco-Sánchez <sup>2</sup>, Esther Pérez-Carrillo <sup>3</sup>, Luis Martín Marín-Obispo <sup>3</sup>, Carmen Hernández-Brenes <sup>3</sup>, Arlette Santacruz <sup>3</sup> and Daniel A. Jacobo-Velázquez <sup>1,\*</sup>

<sup>1</sup> Tecnológico de Monterrey, Escuela de Ingeniería y Ciencias, Av. General Ramón Corona 2514, Zapopan 45201, Mexico; andrea.rebeca.gf@gmail.com (A.R.G.-F.); paulinnafb1995@gmail.com (P.F.-B.)

<sup>2</sup> Escuela Mexicana de Confitería y Chokolatería, Melchor Ocampo 926, San Luis Potosí 78280, Mexico; ccinvestigacionc@gmail.com

<sup>3</sup> Tecnológico de Monterrey, Escuela de Ingeniería y Ciencias, Av. Eugenio Garza Sada 2501, Monterrey 64849, Mexico; perez.carrillo@tec.mx (E.P.-C.); lmmarin@live.com.mx (L.M.M.-O.); chbrenes@tec.mx (C.H.-B.); asantacruz@tec.mx (A.S.)

\* Correspondence: djacobov@tec.mx; Tel.: +52-312-119-1650

**Table S1.** Fatty acid profile (mg fatty acid per 100 g sample FW<sup>-1</sup>) of fish oil used as source of  $\omega$ -3 polyunsaturated fatty acids.

| Fatty acid                         | Fish oil<br>(mg fatty acid/100 g FW <sup>-1</sup> ) |
|------------------------------------|-----------------------------------------------------|
| Octanoic acid (C8:0)               | 183.6 ± 14.6                                        |
| Decanoic acid (C10:0)              | N.D.                                                |
| Lauric acid (C12:0)                | 98.3 ± 1.7                                          |
| Myristic acid (C14:0)              | 8375.8 ± 22.2                                       |
| Pentadecanoic acid (C15:0)         | 759.4 ± 6.9                                         |
| Palmitic acid (C16:0)              | 16,842.4 ± 62.0                                     |
| Heptadecanoic acid (C17:0)         | 683.0 ± 6.3                                         |
| Stearic acid (C18:0)               | 3283.4 ± 9.5                                        |
| Arachidic acid (C20:0)             | 178.6 ± 2.7                                         |
| Behenic acid (C22:0)               | 149.8 ± 3.0                                         |
| Lignoceric acid (C24:0)            | 165.9 ± 1.8                                         |
| Myristoleic acid (C14:1)           | 59.0 ± 2.2                                          |
| Palmitoleic acid (C16:1)           | 11,325.6 ± 19.1                                     |
| Oleic Acid (C18:1)                 | 4907.2 ± 26.6                                       |
| Vaccenic acid (C18:1)              | 2906.6 ± 12.9                                       |
| Eicosenoic acid (C20:1)            | 498.5 ± 3.2                                         |
| Nervonic acid (C24:1)              | 399.5 ± 1.6                                         |
| Linoleic acid (C18:2)              | 1842.2 ± 47.9                                       |
| Gamma Linolenic acid (C18:3)       | 268.3 ± 5.0                                         |
| Alpha Linolenic acid (C18:3)       | 2009.1 ± 6.7                                        |
| Stearidionic acid (C18:4)          | 3458.1 ± 18.5                                       |
| Eicosadienoic acid (C20:2)         | 458.7 ± 1.8                                         |
| Homo-gamma-linolenic acid (C20:3)  | 282.5 ± 1.4                                         |
| Dihomogamma linolenic acid (C20:3) | 372.9 ± 22.5                                        |
| Arachidonic acid (C20:4)           | 851.2 ± 9.1                                         |
| Eicosapentaenoic acid (C20:5)      | 12,862.1 ± 17.8                                     |
| Docosapentaenoic acid n-6 (C22:5)  | 331.1 ± 21.1                                        |
| Docosapentaenoic acid n-3 (C22:5)  | 1888.1 ± 25.5                                       |
| Docosahexaenoic acid (C22:6)       | 14,122.2 ± 27.0                                     |
| Total $\omega$ -3                  | 34,712.6 ± 57.3                                     |
| Total $\omega$ -6                  | 4034.0 ± 29.6                                       |
| Saturated fatty acids (SFA)        | 30,720.2 ± 103.6                                    |
| Monounsaturated fatty acids (MUFA) | 20,096.3 ± 55.2                                     |
| Polyunsaturated fatty acids (PUFA) | 38,746.6 ± 45.8                                     |
| <b>Total fatty acids</b>           | <b>89,563.1 ± 189.0</b>                             |

N.D. = not detected.
